# Supplementary material for: Association of oxidative balance score and all-cause and cardiovascular mortality in patients with hyperuricemia and gout: NHANES 1999-2018
Source: Research Square preprint supplement (doi:10.21203/rs.3.rs-6514180/v1), 2025-11-26
Supplement: Supplementary file 1 [file 2092a07c0e79a9a98f3d57d1.docx]

**Supplementary Materials**

[Table S1. Missing counts and proportions of covariates. 2](#_Toc189656151)

[Table S2. Oxidative balance score assignment scheme. 3](#_Toc189656152)

[Table S3. Baseline characteristics of the selected participants.................................................4](#_Toc189656153)

[Table S4. Weighted mean and 95% confidence interval of OBS according to population characteristics. 6](#_Toc189656154)

[Table S5. Association between OBS and mortality in gout and hyperuricemia subjects after excluding outliers of OBS. 7](#_Toc189656157)

[Table S6. Association between OBS and mortality in gout and hyperuricemia subjects after excluding CVD patients at baseline. 8](#_Toc189656158)

[Table S7. Association between OBS and mortality in gout and hyperuricemia subjects after excluding deaths occurring in the first one year of follow-up. 9](#_Toc189656159)

[Table S8. Association between OBS and mortality in gout and hyperuricemia subjects after imputing missing covariates with multiple imputation. 1](#_Toc189656160)0

[Table S9. E-values and lower limit of 95% CIs for the association between OBS and mortality in gout and hyperuricemia subjects. 11](#_Toc189656161)

# Table S1 Missing counts and proportions of covariates.

| **Covariates** | **No. of missing** | **Missing proportion (%)** |
| --- | --- | --- |
| Age | 0 | 0 |
| Sex | 0 | 0 |
| Race/ethnicity | 0 | 0 |
| Marital status | 59 | 0.88 |
| Education attainment | 3 | 0.04 |
| Family PIR | 495 | 7.36 |
| Smoking | 2 | 0.03 |
| Alcohol drinking | 0 | 0 |
| Hypertension | 1 | 0.01 |
| Diabetes | 0 | 0 |

Abbreviations: PIR, poverty-income ratio.

# Table S2 Oxidative balance score assignment scheme.

| **OBS components** | **Property** | **Male** | | |  | **Female** | | |
| --- | --- | --- | --- | --- | --- | --- | --- | --- |
| **0** | **1** | **2** |  | **0** | **1** | **2** |
| Dietary OBS components |  |  |  |  |  |  |  |  |
| Dietary fiber (g/d) | A | <10.60 | 10.60-<18.60 | ≥18.60 |  | <9.00 | 9.00-<15.00 | ≥15.00 |
| Carotene (RE/d) | A | <365.00 | 365.00-<1284.33 | ≥1284.33 |  | <347.00 | 347.00-<1511.00 | ≥1511.00 |
| Riboflavin (mg/d) | A | <1.55 | 1.55-<2.43 | ≥2.43 |  | <1.18 | 1.18-<1.83 | ≥1.83 |
| Niacin (mg/d) | A | <20.82 | 20.82-<32.01 | ≥32.01 |  | <14.35 | 14.35-<22.54 | ≥22.54 |
| Vitamin B6 (mg/d) | A | <1.55 | 1.55-<2.46 | ≥2.46 |  | <1.06 | 1.06-<1.75 | ≥1.75 |
| Total folate (mcg/d) | A | <282.00 | 282.00-<458.00 | ≥458.00 |  | <213.00 | 213.00-<348.00 | ≥348.00 |
| Vitamin B12 (mcg/d) | A | <2.96 | 2.96-<5.68 | ≥5.68 |  | <1.99 | 1.99-<3.98 | ≥3.98 |
| Vitamin C (mg/d) | A | <26.90 | 26.90-<86.70 | ≥86.70 |  | <24.10 | 24.10-<72.90 | ≥72.90 |
| Vitamin E (ATE) (mg/d) | A | <5.10 | 5.10-<9.10 | ≥9.10 |  | <4.26 | 4.26-<7.44 | ≥7.44 |
| Calcium (mg/d) | A | <591.00 | 591.00-<1030.32 | ≥1030.32 |  | <501.00 | 501.00-<826.00 | ≥826.00 |
| Magnesium (mg/d) | A | <233.00 | 233.00-<353.08 | ≥353.08 |  | <181.00 | 181.00-<268.56 | ≥268.56 |
| Zinc (mg/d) | A | <8.59 | 8.59-<13.82 | ≥13.82 |  | <6.22 | 6.22-<9.80 | ≥9.80 |
| Copper (mg/d) | A | <0.95 | 0.95-<1.44 | ≥1.44 |  | <0.75 | 0.75-<1.13 | ≥1.13 |
| Selenium (mcg/d) | A | <91.70 | 91.70-<142.53 | ≥142.53 |  | <66.80 | 66.80-<103.70 | ≥103.70 |
| Total fat (g/d) | P | ≥100.50 | 62.51-<100.50 | <62.51 |  | ≥76.88 | 48.20-<76.88 | <48.20 |
| Iron (mg/d) | P | ≥16.95 | 10.97-<16.95 | <10.97 |  | ≥13.12 | 8.43-<13.12 | <8.43 |
| Lifestyle OBS components |  |  |  |  |  |  |  |  |
| Physical activity (MET-minute/week) | A | <480.00 | 480.00-<2880.00 | ≥2880.00 |  | <40.00 | 40.00-<1260.00 | ≥1260.00 |
| Alcohol (g/d) | P | ≥30 | 0-<30 | 0 |  | ≥15 | 0-<15 | 0 |
| Body mass index (kg/m2) | P | ≥32.90 | 28.09-<32.09 | <28.09 |  | ≥36.82 | 30.20-<36.82 | <30.20 |
| Cotinine (ng/mL) | P | ≥1.97 | 0.04-<1.97 | <0.04 |  | ≥0.34 | 0.03-<0.34 | <0.03 |

Abbreviations: A, antioxidant; ATE, alpha-tocopherol equivalent; MET, metabolic equivalent; OBS, oxidative balance score; P, prooxidant; RE, retinol equivalent.

**Table S3** Baseline characteristics of the selected participants.

| **Characteristics**a | **Overall (N=6178)** |
| --- | --- |
| Age, years | 49.21 (0.28) |
| Male, n (%) | 3822 (62.47) |
| Race/ethnicity, n (%) |  |
| Non-Hispanic white | 2912 (72.45) |
| Non-Hispanic black | 1560 (11.33) |
| Mexican American | 743 (5.75) |
| Others | 963 (10.46) |
| Marital status, n (%) |  |
| Married | 3313 (57.06) |
| Single | 2421 (35.55) |
| Living with a partner | 444 (7.39) |
| Education attainment, n (%) |  |
| Under high school | 1376 (14.11) |
| High school | 1522 (25.52) |
| Above high school | 3280 (60.37) |
| Family PIR, n (%) |  |
| <1.3 | 1794 (19.32) |
| 1.3-<3.5 | 2364 (36.02) |
| ≥3.5 | 2020 (44.66) |
| Current smoking, n (%) | 1317 (20.47) |
| Current drinking, n (%) | 4654 (79.87) |
| Hypertension, n (%) | 3764 (55.82) |
| Diabetes, n (%) | 1464 (17.85) |
| OBS | 20.90 (0.15) |
| OBS components |  |

**Table S3** (continued )

| **Characteristics**a | **Overall (N=6178)** |
| --- | --- |
| Dietary fiber, g/d | 15.52 (0.18) |
| Carotene, RE/d | 2305.05 (71.98) |
| Riboflavin, mg/d | 2.11 (0.02) |
| Niacin, mg/d | 26.88 (0.27) |
| Vitamin B6, mg/d | 2.10 (0.03) |
| Total folate, mcg/d | 392.28 (4.34) |
| Vitamin B12, mcg/d | 5.11 (0.09) |
| Vitamin C, mg/d | 75.66 (1.38) |
| Vitamin E (ATE), mg/d | 8.28 (0.13) |
| Calcium, mg/d | 890.64 (9.84) |
| Magnesium, mg/d | 297.45 (2.92) |
| Zinc, mg/d | 11.76 (0.14) |
| Copper, mg/d | 1.26 (0.01) |
| Selenium, mcg/d | 117.41 (1.11) |
| Total fat, g/d | 84.88 (0.90) |
| Iron, mg/d | 14.58 (0.15) |
| Physical activity, MET-minute/week | 3255.23 (121.63) |
| Alcohol, g/d | 9.95 (0.35) |
| Body mass index, kg/m2 | 32.53 (0.15) |
| Cotinine, ng/mL | 64.89 (2.85) |

a Continuous variables were expressed as weighted means and standard errors and categorical variables were expressed as numbers and weighted percentages. The sums of percentages may not reach 100%, owing to the rounding of decimals.

Abbreviations: ATE, alpha-tocopherol equivalent; MET, metabolic equivalent; OBS, oxidative balance score; PIR, poverty-income ratio.

# Table S4 Weighted mean and 95% confidence interval of OBS according to population characteristics.

| **Characteristics** | **No. of subjects** | **Weighted mean (95% CI)** | ***P*-value** |
| --- | --- | --- | --- |
| **Overall** | 6178 | 20.90 (20.61-21.19) |  |
| **Age, years** |  |  | 0.23 |
| <50 | 2545 | 21.04 (20.65-21.44) |  |
| ≥50 | 3633 | 20.77 (20.43-21.10) |  |
| **Sex** |  |  | 0.28 |
| Male | 3822 | 20.81 (20.50-21.12) |  |
| Female | 2356 | 21.06 (20.62-21.49) |  |
| **Race/ethnicity** |  |  | <0.001 |
| Others | 3822 | 20.81 (20.50-21.12) |  |
| Non-Hispanic white | 2356 | 21.06 (20.62-21.49) |  |
| **Marital status** |  |  | <0.001 |
| Others | 2600 | 20.28 (19.88-20.67) |  |
| Married | 3578 | 21.37 (21.01-21.73) |  |
| **Education attainment** |  |  | <0.001 |
| High school and below | 2898 | 19.58 (19.20-19.97) |  |
| Above high school | 3280 | 21.76 (21.42-22.11) |  |
| **Family PIR** |  |  | <0.001 |
| <3.5 | 4158 | 19.85 (19.51-20.18) |  |
| ≥3.5 | 2020 | 22.21 (21.82-22.59) |  |
| **Current smoking** |  |  | <0.001 |
| No | 4861 | 21.44 (21.16-21.72) |  |
| Yes | 1317 | 18.80 (18.20-19.40) |  |
| **Current drinking** |  |  | 0.02 |
| No | 1524 | 20.33 (19.76-20.90) |  |
| Yes | 4654 | 21.04 (20.73-21.35) |  |
| **Hypertension** |  |  | 0.005 |
| No | 2414 | 21.25 (20.84-21.67) |  |
| Yes | 3764 | 20.62 (20.31-20.93) |  |
| **Diabetes** |  |  | <0.001 |
| No | 4714 | 21.11 (20.79-21.42) |  |
| Yes | 1464 | 19.95 (19.42-20.48) |  |

Abbreviations: CI, confidence interval; OBS, oxidative balance score; PIR, poverty-income ratio.

# Table S5 Association between OBS and mortality in gout and hyperuricemia subjects after excluding outliers of OBS.

| **Outcome** | **Quartiles of OBS** | | | | ***P*-trend** | **Continuous** |
| --- | --- | --- | --- | --- | --- | --- |
| **Q1 (lowest)** | **Q2** | **Q3** | **Q4 (highest)** |
| Range | <16 | 16-20 | 21-26 | >26 |  |  |
| All-cause mortality |  |  |  |  |  |  |
| Deaths/person-years | 364/14955 | 238/11134 | 234/14247 | 118/11187 |  | 954/51523 |
| Crude model | 1.00 (reference) | 0.99 (0.81-1.21) | 0.69 (0.54-0.86) | 0.42 (0.32-0.56) | <0.001 | 0.96 (0.95-0.97) |
| Model 1a | 1.00 (reference) | 0.92 (0.74-1.13) | 0.67 (0.54-0.84) | 0.42 (0.32-0.55) | <0.001 | 0.96 (0.95-0.97) |
| Model 2b | 1.00 (reference) | 1.10 (0.89-1.35) | 0.89 (0.72-1.10) | 0.58 (0.45-0.76) | <0.001 | 0.98 (0.97-0.99) |
| cardiovascular mortality |  |  |  |  |  |  |
| Deaths/person-years | 126/14955 | 91/11134 | 71/14247 | 34/11187 |  | 322/51523 |
| Crude model | 1.00 (reference) | 1.16 (0.82-1.65) | 0.71 (0.47-1.05) | 0.36 (0.22-0.59) | <0.001 | 0.96 (0.94-0.98) |
| Model 1a | 1.00 (reference) | 1.07 (0.75-1.52) | 0.69 (0.47-1.01) | 0.36 (0.23-0.58) | <0.001 | 0.96 (0.94-0.98) |
| Model 2b | 1.00 (reference) | 1.28 (0.91-1.81) | 0.92 (0.63-1.36) | 0.50 (0.31-0.80) | 0.004 | 0.98 (0.96-1.00) |

a Model 1 was adjusted for age (<50, ≥50 years), sex (male, female), and race/ethnicity (non-Hispanic white, others).

b Model 2 was further adjusted for marital status (married, others), family poverty-income ratio (<3.5, ≥3.5), education attainment (above high school, high school and below), current smoking (yes, no), current drinking (yes, no), hypertension (yes, no), and diabetes (yes, no).

Abbreviations: OBS, oxidative balance score.

# Table S6 Association between OBS and mortality in gout and hyperuricemia subjects after excluding CVD patients at baseline.

| **Outcome** | **Quartiles of OBS** | | | | ***P*-trend** | **Continuous** |
| --- | --- | --- | --- | --- | --- | --- |
| **Q1 (lowest)** | **Q2** | **Q3** | **Q4 (highest)** |
| Range | <15 | 15-20 | 21-26 | >26 |  |  |
| All-cause mortality |  |  |  |  |  |  |
| Deaths/person-years | 226/11859 | 179/11721 | 153/12447 | 82/9828 |  | 640/45854 |
| Crude model | 1.00 (reference) | 0.93 (0.73-1.19) | 0.66 (0.50-0.86) | 0.43 (0.30-0.61) | <0.001 | 0.96 (0.95-0.97) |
| Model 1a | 1.00 (reference) | 0.85 (0.66-1.10) | 0.63 (0.48-0.84) | 0.41 (0.29-0.58) | <0.001 | 0.96 (0.94-0.97) |
| Model 2b | 1.00 (reference) | 1.04 (0.80-1.36) | 0.84 (0.63-1.12) | 0.58 (0.41-0.82) | 0.002 | 0.98 (0.96-0.99) |
| cardiovascular mortality |  |  |  |  |  |  |
| Deaths/person-years | 69/11859 | 58/11721 | 47/12447 | 20/9828 |  | 194/45854 |
| Crude model | 1.00 (reference) | 0.96 (0.63-1.46) | 0.71 (0.46-1.12) | 0.38 (0.22-0.66) | <0.001 | 0.96 (0.94-0.99) |
| Model 1a | 1.00 (reference) | 0.88 (0.56-1.36) | 0.68 (0.44-1.06) | 0.37 (0.22-0.62) | <0.001 | 0.96 (0.94-0.98) |
| Model 2b | 1.00 (reference) | 1.09 (0.70-1.69) | 0.92 (0.58-1.45) | 0.53 (0.31-0.91) | 0.04 | 0.98 (0.95-1.00) |

a Model 1 was adjusted for age (<50, ≥50 years), sex (male, female), and race/ethnicity (non-Hispanic white, others).

b Model 2 was further adjusted for marital status (married, others), family poverty-income ratio (<3.5, ≥3.5), education attainment (above high school, high school and below), current smoking (yes, no), current drinking (yes, no), hypertension (yes, no), and diabetes (yes, no).

Abbreviations: CVD, cardiovascular disease; OBS, oxidative balance score.

# Table S7 Association between OBS and mortality in gout and hyperuricemia subjects after excluding deaths occurring in the first one year of follow-up.

| **Outcome** | **Quartiles of OBS** | | | | ***P*-trend** | **Continuous** |
| --- | --- | --- | --- | --- | --- | --- |
| **Q1 (lowest)** | **Q2** | **Q3** | **Q4 (highest)** |
| Range | <16 | 16-20 | 21-26 | >26 |  |  |
| All-cause mortality |  |  |  |  |  |  |
| Deaths/person-years | 305/13349 | 268/13245 | 220/14252 | 112/11611 |  | 905/52458 |
| Crude model | 1.00 (reference) | 0.96 (0.77-1.18) | 0.67 (0.53-0.86) | 0.40 (0.30-0.53) | <0.001 | 0.96 (0.95-0.97) |
| Model 1a | 1.00 (reference) | 0.89 (0.71-1.12) | 0.65 (0.52-0.83) | 0.39 (0.30-0.51) | <0.001 | 0.96 (0.95-0.97) |
| Model 2b | 1.00 (reference) | 1.04 (0.82-1.32) | 0.86 (0.68-1.09) | 0.53 (0.40-0.70) | <0.001 | 0.98 (0.96-0.99) |
| cardiovascular mortality |  |  |  |  |  |  |
| Deaths/person-years | 108/13349 | 98/13245 | 67/14252 | 32/11611 |  | 305/52458 |
| Crude model | 1.00 (reference) | 1.01 (0.72-1.42) | 0.63 (0.43-0.94) | 0.33 (0.20-0.53) | <0.001 | 0.95 (0.94-0.97) |
| Model 1a | 1.00 (reference) | 0.94 (0.66-1.34) | 0.61 (0.42-0.91) | 0.32 (0.20-0.52) | <0.001 | 0.95 (0.94-0.97) |
| Model 2b | 1.00 (reference) | 1.09 (0.75-1.59) | 0.81 (0.54-1.22) | 0.44 (0.27-0.72) | 0.001 | 0.97 (0.95-0.99) |

a Model 1 was adjusted for age (<50, ≥50 years), sex (male, female), and race/ethnicity (non-Hispanic white, others).

b Model 2 was further adjusted for marital status (married, others), family poverty-income ratio (<3.5, ≥3.5), education attainment (above high school, high school and below), current smoking (yes, no), current drinking (yes, no), hypertension (yes, no), and diabetes (yes, no).

Abbreviations: OBS, oxidative balance score.

# Table S8 Association between OBS and mortality in gout and hyperuricemia subjects after imputing missing covariates with multiple imputation.

| **Outcome** | **Quartiles of OBS** | | | | ***P*-trend** | **Continuous** |
| --- | --- | --- | --- | --- | --- | --- |
| **Q1 (lowest)** | **Q2** | **Q3** | **Q4 (highest)** |
| Range | <16 | 16-20 | 21-26 | >26 |  |  |
| All-cause mortality |  |  |  |  |  |  |
| Deaths/person-years | 364/14561 | 312/14405 | 259/15646 | 135/12828 |  | 1070/57440 |
| Crude model | 1.00 (reference) | 0.98 (0.81-1.19) | 0.68 (0.56-0.83) | 0.40 (0.30-0.53) | <0.001 | 0.96 (0.95-0.97) |
| Model 1a | 1.00 (reference) | 0.91 (0.74-1.11) | 0.66 (0.54-0.81) | 0.39 (0.29-0.51) | <0.001 | 0.96 (0.95-0.97) |
| Model 2b | 1.00 (reference) | 1.06 (0.84-1.35) | 0.85 (0.68-1.06) | 0.53 (0.41-0.70) | <0.001 | 0.98 (0.96-0.99) |
| cardiovascular mortality |  |  |  |  |  |  |
| Deaths/person-years | 128/14561 | 109/14405 | 78/15646 | 37/12828 |  | 352/57440 |
| Crude model | 1.00 (reference) | 0.91 (0.65-1.26) | 0.62 (0.43-0.87) | 0.28 (0.18-0.46) | <0.001 | 0.95 (0.93-0.97) |
| Model 1a | 1.00 (reference) | 0.84 (0.60-1.17) | 0.59 (0.42-0.83) | 0.28 (0.17-0.44) | <0.001 | 0.95 (0.93-0.97) |
| Model 2b | 1.00 (reference) | 1.01 (0.69-1.48) | 0.81 (0.55-1.18) | 0.41 (0.25-0.66) | <0.001 | 0.97 (0.95-0.99) |

a Model 1 was adjusted for age (<50, ≥50 years), sex (male, female), and race/ethnicity (non-Hispanic white, others).

b Model 2 was further adjusted for marital status (married, others), family poverty-income ratio (<3.5, ≥3.5), education attainment (above high school, high school and below), current smoking (yes, no), current drinking (yes, no), hypertension (yes, no), and diabetes (yes, no).

Abbreviations: OBS, oxidative balance score.

# Table S9 E-values and lower limit of 95% CIs for the association between OBS and mortality in gout and hyperuricemia subjects.

| **Outcome** | **HR (95% CI)** | ***E*-value** |
| --- | --- | --- |
| **All-cause mortality** |  |  |
| **Quartiles of OBS** |  |  |
| Q1 | 1.00 (ref.) | – |
| Q2 | 1.00 (0.79-1.28) | 1.00 |
| Q3 | 0.84 (0.67-1.06) | 1.67 |
| Q4 | 0.53 (0.40-0.69) | 3.18 |
| **Continuous** | 0.98 (0.96-0.99) | 1.16 |
| **cardiovascular mortality** |  |  |
| **Quartiles of OBS** |  |  |
| Q1 | 1.00 (ref.) | – |
| Q2 | 1.03 (0.72-1.49) | 1.21 |
| Q3 | 0.80 (0.54-1.19) | 1.81 |
| Q4 | 0.41 (0.25-0.67) | 4.31 |
| **Continuous** | 0.97 (0.95-0.99) | 1.21 |

Abbreviations: CI, confidence interval; HR, hazard ratio; OBS, oxidative balance score.
